# Supplementary material for: A ternary nanocomposite based on nickel(iii) oxide@f-CNF/rGO for efficient electrochemical detection of an antipsychotic drug (Klonopin) in biological samples
Source: Royal Society of Chemistry journal article supplement (doi:10.1039/d0nj01360a), 2020-01-01
Supplement: d0nj01360a1.pdf [file d0nj01360a1.pdf]

1 **A ternary nanocomposite based on nickel(III) oxide@*f*-CNF/rGO for efficient**  
2 **electrochemical detection of antipsychotic drug (klonopin) in biological samples**

3 Balasubramanian Sriram, Mani Govindasamy\*, Sea-Fue Wang\* and Xavier Benadict Joseph

4

5

6

7

8

9 Department of Materials and Mineral Resources Engineering, National Taipei University of  
10 Technology, No. 1, Sec. 3, Chung-Hsiao East Rd., Taipei 106, Taiwan.

11

12 Corresponding authors:

13 \* E-mail: [sfwang@ntut.edu.tw](mailto:sfwang@ntut.edu.tw), [govindasamy420700@gmail.com](mailto:govindasamy420700@gmail.com)

14

15

16

17

18

19

20

21

22

23

24

25

26

1

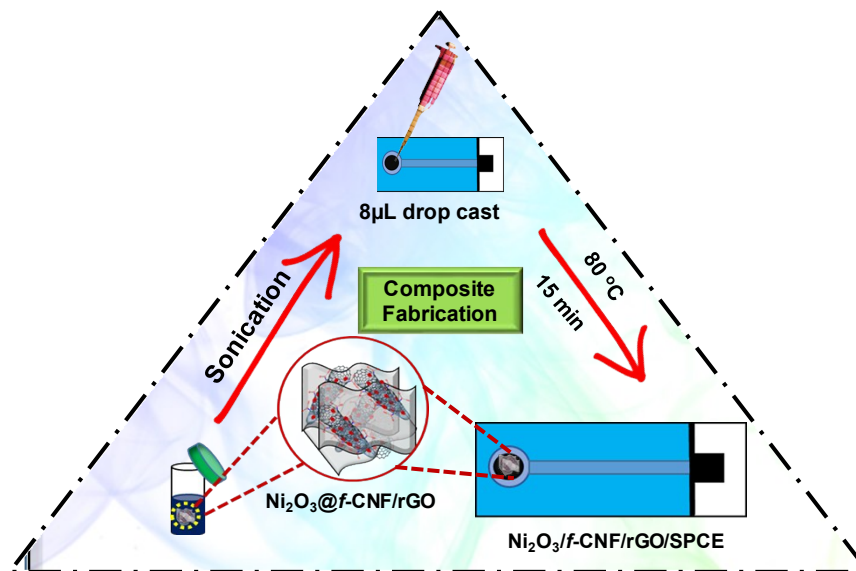

2

3 **Fig. S1.** Fabrication of  $\text{Ni}_2\text{O}_3@f\text{-CNF/rGO}$  modified electrode

4 **Table S1:** Comparison of charge transfer resistance ( $R_{ct}$ ) observed at  $\text{Ni}_2\text{O}_3@f\text{-CNF/rGO}$  and  
5 control modified electrodes

| Different modified electrode             | $R_{ct}$ ( $\Omega$ ) |
|------------------------------------------|-----------------------|
| Bare                                     | 3041.44               |
| <i>f</i> -CNF/rGO                        | 2856.97               |
| $\text{Ni}_2\text{O}_3$                  | 2089.99               |
| $\text{Ni}_2\text{O}_3@f\text{-CNF/rGO}$ | 263.76                |

6

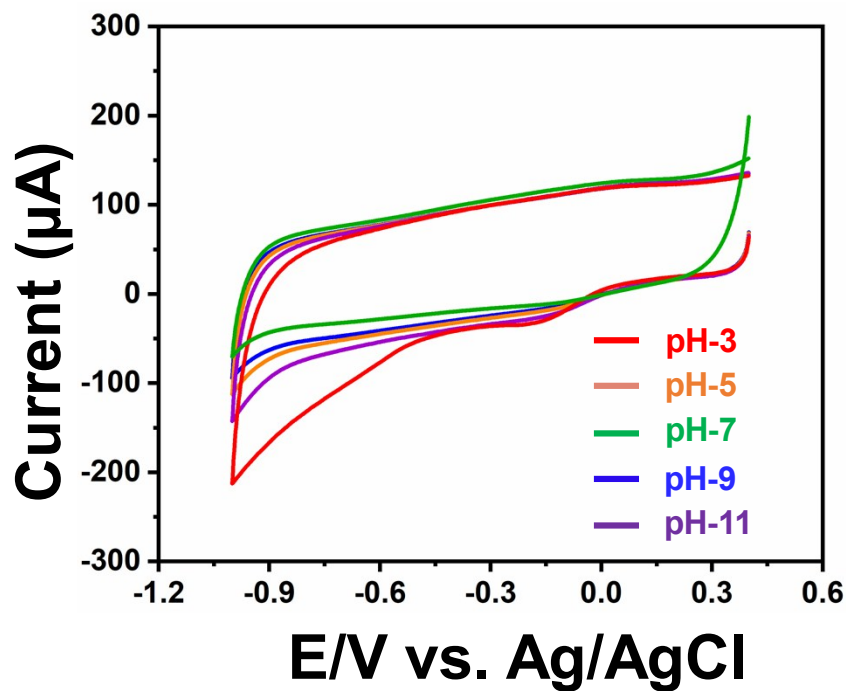

1

2 **Fig. S2.** pH response of the Ni<sub>2</sub>O<sub>3</sub>@f-CNF/rGO nanocomposite

3

4

5 **The detection limit (LOD) was calculated using the following equation**

6

$$\text{LOD} = 3S_B/s$$

7 where 'S<sub>B</sub>' is the standard deviation of blank signal and 's' is sensitivity = 0.8766

8 .

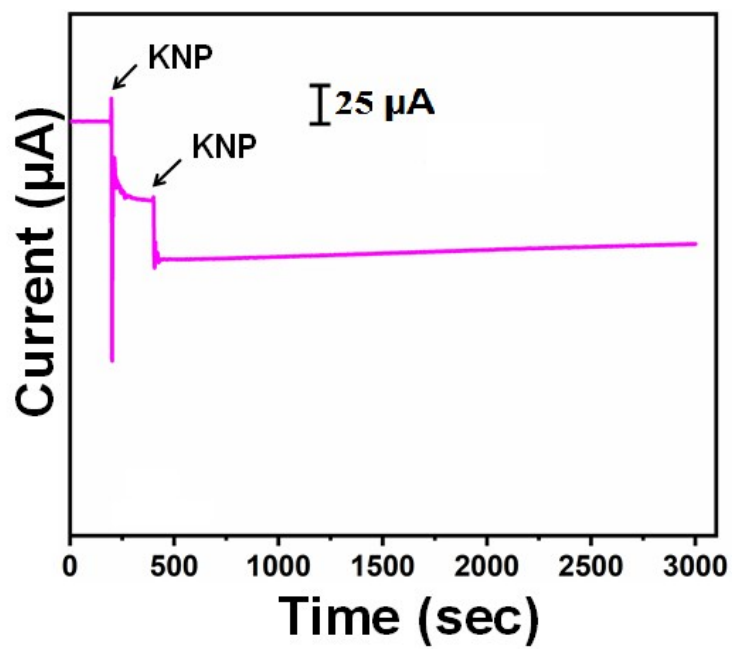

1

2 **Fig. S3.** The amperometric response of Ni<sub>2</sub>O<sub>3</sub>@*f*-CNF/rGO modified RDE for the stability carried  
3 out with the addition of 100 μM of KNP in 0.05 M PB (pH 7.0) up to 3000 s.

4
